# Supplementary material for: Intravenous Tranexamic Acid Reduces Blood Loss and Transfusion Volume in Scoliosis Surgery for Spinal Muscular Atrophy: Results of a 20-Year Retrospective Analysis
Source: MDPI journal article supplement (doi:10.3390/ijerph18199959), 2021-09-22
Supplement: s1 [file s1]

## Supplementary Material

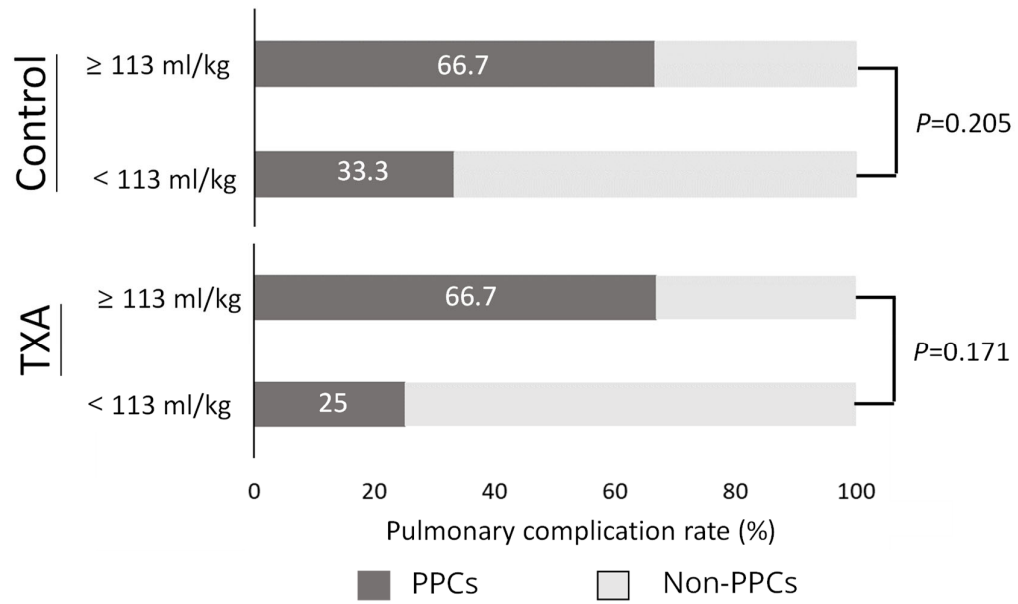

**Figure S1.** Percentage of patients with pulmonary complications (PPCs) between crystalloid volume overload ( $\geq 113$  ml/kg) and non-overload ( $< 113$  ml/kg) subgroups in the control (upper side) and tranexamic acid (TXA) (lower side) groups, respectively.
